# Supplementary material for: Bioclogging alleviation for constructed wetland based on the interaction among biofilm growth and hydrodynamics
Source: Research Square preprint supplement (doi:10.21203/rs.3.rs-1757080/v1), 2022-07-19
Supplement: Supplementary file 1 [file 9572582b51ff3cde154f3efc.docx]

**The Supplementary materials for：**

Bioclogging alleviation for constructed wetland based on the interaction among biofilm growth and hydrodynamics


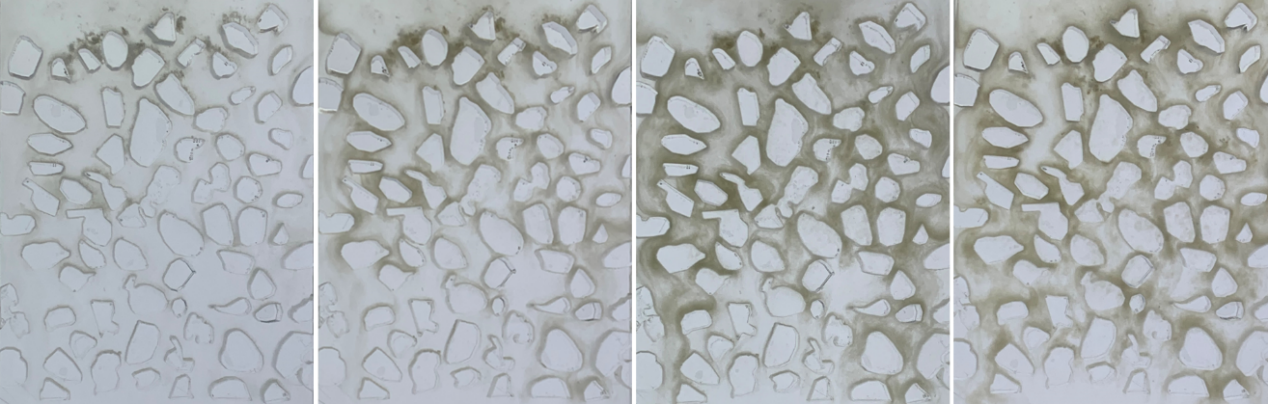


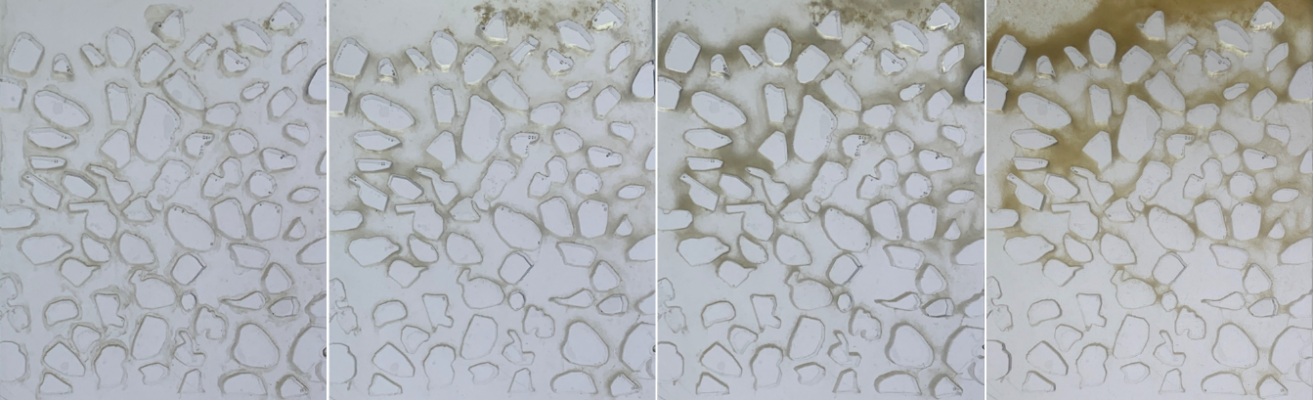


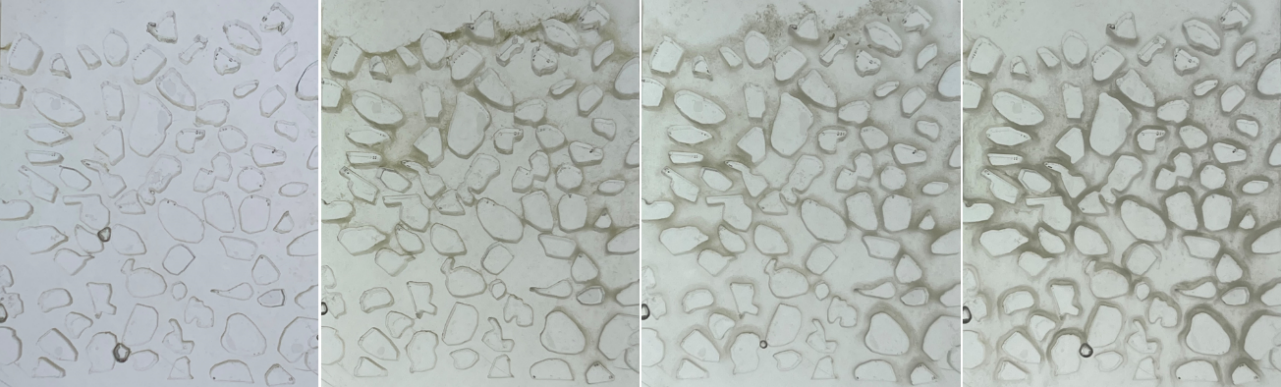


Fig.S1 The photo of the biofilm development in the PMFC

Fig.S2 the biofilm development with the time

Fig.S3 the biomass distribution vertically in the columns
